# Supplementary material for: Cloning and Functional Assessments of Floral-Expressed SWEET Transporter Genes from Jasminum sambac
Source: MDPI journal article supplement (doi:10.3390/ijms20164001), 2019-08-16
Supplement: s1 [file s1]

Supplemental Table S1. List of Primers used for RACE cloning

| Gene_ID          | Primer id     | Primer Sequence (5'- 3')                    |
|------------------|---------------|---------------------------------------------|
| <i>JsSWEET1</i>  | c50045-GSP1   | GATTACGCCAAGCTTAGGACAAGAAGAAGGGCATGAACTCCA  |
|                  | c50045-GSP2   | GATTACGCCAAGCTTCCAATTCCCTTTTTTCATTCTCAAGCGA |
|                  | c500-3-1      | CCAATTCCTTTTTTCATTCTCAAGCGA                 |
|                  | c500-3-2      | TGGCTCCAACGATTACATTCAAGAGG                  |
|                  | c500-5-1      | AGGACAAGAAGAAGGGCATGAACTCCA                 |
|                  | c500-5-2      | CATAAACTGATTCAATCGCTGCACCA                  |
|                  | C500-5race-np | TCCTCATGATGGAGAGAGGAGAAGCATAACATTATG        |
|                  | C500-3race-np | CTTCGGTGTTTTTGAAATGCTACTGGATTATTTCTC        |
| <i>JsSWEER2</i>  | c60775-GSP1   | GATTACGCCAAGCTTTGTATAATCCCAAGAATTGCTCCGACCC |
|                  | c60775-GSP2   | GATTACGCCAAGCTTAGAGAATCATCAGAAGCAAATCGACCGA |
|                  | c607-5-1      | GCGTCCTTCTTAAACATCCCGTACGCAA                |
|                  | c607-5-2      | TGCAAATACGCCAAGAACCGCAGCAA                  |
| <i>JsSWEET5</i>  | c41111-GSP1   | GATTACGCCAAGCTTTGAACAACCTCCAGACAATGTCCCCAA  |
|                  | c41111-GSP2   | GATTACGCCAAGCTTGCTAGGACGATTGTTGGAATCTTTGGC  |
|                  | c411-3-1      | TCAACGGTGGAGGGTTCGCGATCGA                   |
|                  | c411-3-2      | TCTTCCTCGTCTATGCTGGCTCGGC                   |
| <i>JsSWEET9</i>  | c51507-GSP1   | GATTACGCCAAGCTTTTTCCACGTTAAGATTTGGGTCGTCG   |
|                  | c51507-GSP2   | GATTACGCCAAGCTTTCAGTTGCACTCTTCAGTGCTTCATTGT |
| <i>JsSWEET10</i> | c447-3-1      | CCTACTGATAATTTGTGGGTTCGGTC                  |
|                  | c447-3-2      | CTTGCGGTGAAAGCTTCGCAGCGTGTCC                |
|                  | c44769-GSP1   | GATTACGCCAAGCTTTGTCAATTATTTGCTCCCGAAATTCTGG |
|                  | c44769-GSP2   | GATTACGCCAAGCTTGGTTCCAATCAATTCCTTATGTGGTTGC |

|                  |               |                                            |
|------------------|---------------|--------------------------------------------|
| <i>JsSWEET16</i> | c51046-GSP1   | GATTACGCCAAGCTTTAAACCTGACCCATTTGCTACCTGCAC |
|                  | c51046-GSP2   | GATTACGCCAAGCTTTTTCTCGCCCCAGTTGGTACTTTTTG  |
| <i>JsSWEET17</i> | c42726-GSP1   | GATTACGCCAAGCTTTCACGGTAAATTGCATAGAGCACCAGC |
|                  | c42726-GSP2   | GATTACGCCAAGCTTTCAGTGAAGACATTTTGGAGGATTGTG |
|                  | c427-5race-np | ACAAATCCTATTGCATTTGGTACCCCAAGAAACCAG       |
|                  | c427-3race-np | TGAGAGCCTTCCTTATGTTTGTACGCTGTTG            |

Supplemental Table S2. List of Primers used for full length PCR amplification

| Primer id                       | Primer Sequence (5' - 3')                    |
|---------------------------------|----------------------------------------------|
| Gateway cloning                 |                                              |
| JsSWEET1-gw-5F                  | caccATGGGGCATGAAATCTCACATCATTAC              |
| JsSWEET1-3r                     | TGGATGTGGAAGCAGGGGCTCTC                      |
| JsSWEET2-gw-5F                  | caccATGGTCCACACGATGTCTGAAGGCGGCTTG           |
| JsSWEET2-3r                     | TGCATAGGACTCGAGTAAGGGTCTCTG                  |
| JsSWEET5-gw-5F                  | caccATGATGAGCAGCGACAAAGCTAGGACGATTG          |
| JsSWEET5-3r                     | GGCATTAGTCCCCGGCATTTC AACC                   |
| JsSWEET9-gw-5F                  | caccATGGCGTTTCCAAGTGTTCAAACCTTGG             |
| JsSWEET9-3r                     | CACTGCAGTCAACTGTCTATGATCATGTG                |
| JsSWEET10-gw-5F                 | caccATGGCAGTTCCGTCTGGATATTGGGTTC             |
| JsSWEET10-3r                    | ATTAACCTCAATTTCAATTAGGCAAATTCGATGTTTATG      |
| JsSWEET16-gw-5F                 | caccATGGGGTCCCTTCTCTATTTTCCC                 |
| JsSWEET16-3r                    | TTGTTTGGGCTTGCTTAGGCCCA                      |
| JsSWEET17-gw-5F                 | caccATGATGCAATCAACCGTAAACATGATG              |
| JsSWEET17-3r                    | CACTTGATTGGCTTTGTCAGCTTCATC                  |
| Yeast expression vector cloning |                                              |
| pRS-JsSWEET1-5F                 | ATGGGGCATGAAATCTCACATCAT                     |
| pRS-JsSWEET1-3R                 | gagagaCTCGAGttaTTGTTTGGGCTTGCTTAGGCCCAT      |
| pRS-JsSWEET2-5F                 | ATGGTCCACACGATGTCTGAAGGCGGCpRS-              |
| JsSWEET2-3R                     | cccAAGCTTttaTGCATAGGACTCGAGTAAGGGTCT         |
| pRS-JsSWEET5-5F                 | ATGATGAGCAGCGACAAAGCTAGGACGATTG              |
| pRS-JsSWEET5-3R                 | gagagaCTCGAGttaGGCATTAGTCCCCGGCATTTC AACC    |
| pRS-JsSWEET9-5F                 | ATGGCGTTTCCAAGTGTTCAAACC                     |
| pRS-JsSWEET9-3R                 | gagagaCTCGAGttaCACTGCAGTCAACTGTCTATGATCATGTG |
| pRS-JsSWEET10-5F                | ATGGCAGTTCCGTCTGGATATTGGGTTC                 |
| pRS-JsSWEET10-3R                | gagagaCTCGAGttaATTAACCTCAATTTCAATTAGGCAAAT   |
| pRS-JsSWEET16-5F                | ATGGGGTCCCTTCTCTATTTTCCCA                    |
| pRS-JsSWEET16-3R                | gagagaCTCGAGttaTGGATGTGGAAGCAGGGGCTCT        |
| pRS-JsSWEET17-5F                | ATGATGCAATCAACCGTAAACATGATG                  |
| pRS-JsSWEET17-3R                | gagagaCTCGAGttaCACTTGATTGGCTTTGTCAGCTTCATC   |

Supplemental Table S3. List of Primers used for RT-qPCR

| Primer id          | Primer Sequence (5' - 3') |
|--------------------|---------------------------|
| JsSWEET1-qrt-600f  | CGTGGAGTTCATGCCCTTCT      |
| JsSWEET1-qrt-715r  | AACCAAAACCATTGGGCACG      |
| JsSWEET2-qrt-403f  | GAACCCCCAACTCGACAACT      |
| JsSWEET2-qrt-525r  | AGGCATGAACTCAACGCTCT      |
| JsSWEET5-qrt-198f  | TCCCGATAGCCTTCTCGTCA      |
| JsSWEET5-qrt-306r  | AATCTTTTTCCGCATGGCCG      |
| JsSWEET9-qrt-388f  | GTGACGATGGTTGGATGGGT      |
| JsSWEET9-qrt-531r  | CGTGGCGTTCATAGTGAGGA      |
| JsSWEET10-qrt-71f  | ATCTTGCTCCACTGCCAACT      |
| JsSWEET10-qrt-170r | AGCATGGCACTGAATAGAGCA     |
| JsSWEET16-qrt-316f | TGTACTCGGAACTGCTCAGC      |
| JsSWEET16-qrt-465r | TATGGATGTGGAAGCAGGGG      |
| JsSWEET17-qrt-648f | GCAGTATTGGCGGGGATTCT      |
| JsSWEET17-qrt-764r | GGCCGCTAAAGGAGAGCAAT      |
| JsACTIN2-QRT-f     | TCTCTATGGTAACATTGTCCTG    |
| JsACTIN2-QRT-r     | ATCCAGACACTGTACTTCCTCT    |

Supplemental Table S4. Percent Identities of JsSWEETs with homologs from Arabidopsis and rice

|           | AtSWEET10 | JsSWEET10 | JsSWEET9  | AtSWEET9  | AtSWEET15 | AtSWEET11 | AtSWEET12 | AtSWEET13 | AtSWEET14 | AtSWEET8  | AtSWEET6 | AtSWEET7 | AtSWEET4 |
|-----------|-----------|-----------|-----------|-----------|-----------|-----------|-----------|-----------|-----------|-----------|----------|----------|----------|
| AtSWEET10 | 100       | 52.19     | 40.87     | 44.44     | 47.1      | 44.96     | 45.13     | 47.16     | 44.69     | 30.7      | 30.77    | 32.93    | 32.93    |
| JsSWEET10 |           | 100       | 49.22     | 51.41     | 47.37     | 49.44     | 50.56     | 49.63     | 50.38     | 35.06     | 29.2     | 30.65    | 32.23    |
| JsSWEET9  |           |           | 100       | 52.92     | 43.95     | 42.8      | 42.8      | 46.61     | 46.72     | 29.61     | 31.2     | 31.98    | 29.34    |
| AtSWEET9  |           |           |           | 100       | 45.19     | 47.5      | 46.67     | 45.45     | 48.1      | 29.91     | 33.74    | 35.83    | 34.31    |
| AtSWEET15 |           |           |           |           | 100       | 50        | 51.65     | 45.88     | 45.69     | 35.65     | 30.52    | 32.93    | 35.54    |
| AtSWEET11 |           |           |           |           |           | 100       | 84.1      | 57.04     | 55.4      | 35.53     | 29.15    | 30.89    | 32.64    |
| AtSWEET12 |           |           |           |           |           |           | 100       | 57.5      | 57.25     | 35.96     | 32.65    | 33.2     | 34.18    |
| AtSWEET13 |           |           |           |           |           |           |           | 100       | 75.27     | 33.92     | 30.52    | 31.85    | 29.46    |
| AtSWEET14 |           |           |           |           |           |           |           |           | 100       | 34.65     | 29.75    | 32.37    | 31.91    |
| AtSWEET8  |           |           |           |           |           |           |           |           |           | 100       | 38.4     | 42.13    | 45.11    |
| AtSWEET6  |           |           |           |           |           |           |           |           |           |           | 100      | 73.64    | 46.61    |
| AtSWEET7  |           |           |           |           |           |           |           |           |           |           |          | 100      | 46.71    |
| AtSWEET4  |           |           |           |           |           |           |           |           |           |           |          |          | 100      |
| JsSWEET5  |           |           |           |           |           |           |           |           |           |           |          |          |          |
| AtSWEET5  |           |           |           |           |           |           |           |           |           |           |          |          |          |
| JsSWEET16 |           |           |           |           |           |           |           |           |           |           |          |          |          |
| JsSWEET17 |           |           |           |           |           |           |           |           |           |           |          |          |          |
| AtSWEET16 |           |           |           |           |           |           |           |           |           |           |          |          |          |
| AtSWEET17 |           |           |           |           |           |           |           |           |           |           |          |          |          |
| AtSWEET3  |           |           |           |           |           |           |           |           |           |           |          |          |          |
| JsSWEET1  |           |           |           |           |           |           |           |           |           |           |          |          |          |
| AtSWEET1  |           |           |           |           |           |           |           |           |           |           |          |          |          |
| OsSWEET2b |           |           |           |           |           |           |           |           |           |           |          |          |          |
| JsSWEET2  |           |           |           |           |           |           |           |           |           |           |          |          |          |
| AtSWEET2  |           |           |           |           |           |           |           |           |           |           |          |          |          |
|           | JsSWEET5  | AtSWEET5  | JsSWEET16 | JsSWEET17 | AtSWEET16 | AtSWEET17 | AtSWEET3  | JsSWEET1  | AtSWEET1  | OsSWEET2b | JsSWEET2 | AtSWEET2 |          |
| AtSWEET10 | 31.14     | 31.17     | 33.19     | 34.8      | 33.78     | 35.37     | 33.61     | 34.07     | 35.5      | 31.42     | 31.86    | 31.28    |          |
| JsSWEET10 | 33.04     | 31.33     | 32.31     | 34.65     | 30.77     | 33.62     | 34.82     | 35.37     | 37.18     | 31.25     | 30.67    | 30.09    |          |
| JsSWEET9  | 34.48     | 28.94     | 32.63     | 33.05     | 34.21     | 33.47     | 32.27     | 34.32     | 35.02     | 31.56     | 32.6     | 33.33    |          |
| AtSWEET9  | 32.62     | 30.08     | 34.32     | 36.86     | 32.31     | 35.83     | 32.65     | 32.63     | 32.34     | 34.96     | 33.04    | 31.14    |          |
| AtSWEET15 | 31.88     | 34.48     | 37.39     | 36.68     | 35.45     | 35.96     | 33.33     | 32.17     | 35.62     | 33.63     | 36.68    | 30       |          |
| AtSWEET11 | 33.77     | 32.03     | 37.55     | 35.81     | 36.2      | 36.96     | 30.04     | 34.5      | 37.93     | 33.93     | 35.68    | 32.89    |          |
| AtSWEET12 | 32.89     | 33.33     | 36.24     | 35.81     | 34.84     | 35.65     | 31.54     | 35.37     | 36.96     | 35.27     | 36.12    | 35.09    |          |
| AtSWEET13 | 31.28     | 30.43     | 38.94     | 38.05     | 34.39     | 34.93     | 31.17     | 37.17     | 40.77     | 36.32     | 34.82    | 34.22    |          |
| AtSWEET14 | 32.89     | 32.75     | 37.89     | 36.12     | 33.33     | 34.35     | 31.95     | 37        | 39.57     | 35.27     | 34.22    | 34.07    |          |
| AtSWEET8  | 44.68     | 44.26     | 34.91     | 39.13     | 38.64     | 37.83     | 34.91     | 35.9      | 40.52     | 29.69     | 31.88    | 31.74    |          |
| AtSWEET6  | 46.41     | 45        | 32.19     | 36.36     | 34.68     | 34.91     | 34.92     | 41.7      | 40.91     | 34.93     | 35.65    | 34.63    |          |
| AtSWEET7  | 48.72     | 48.95     | 32.9      | 38.43     | 39.73     | 37.12     | 35.34     | 42.92     | 43.33     | 35.37     | 35.65    | 33.77    |          |
